# Supplementary material for: Two Arabidopsis late pollen transcripts are detected in cytoplasmic granules
Source: PubMed Central journal article supplement (PMC6508577; doi:10.1002/pld3.12), 2017-10-16

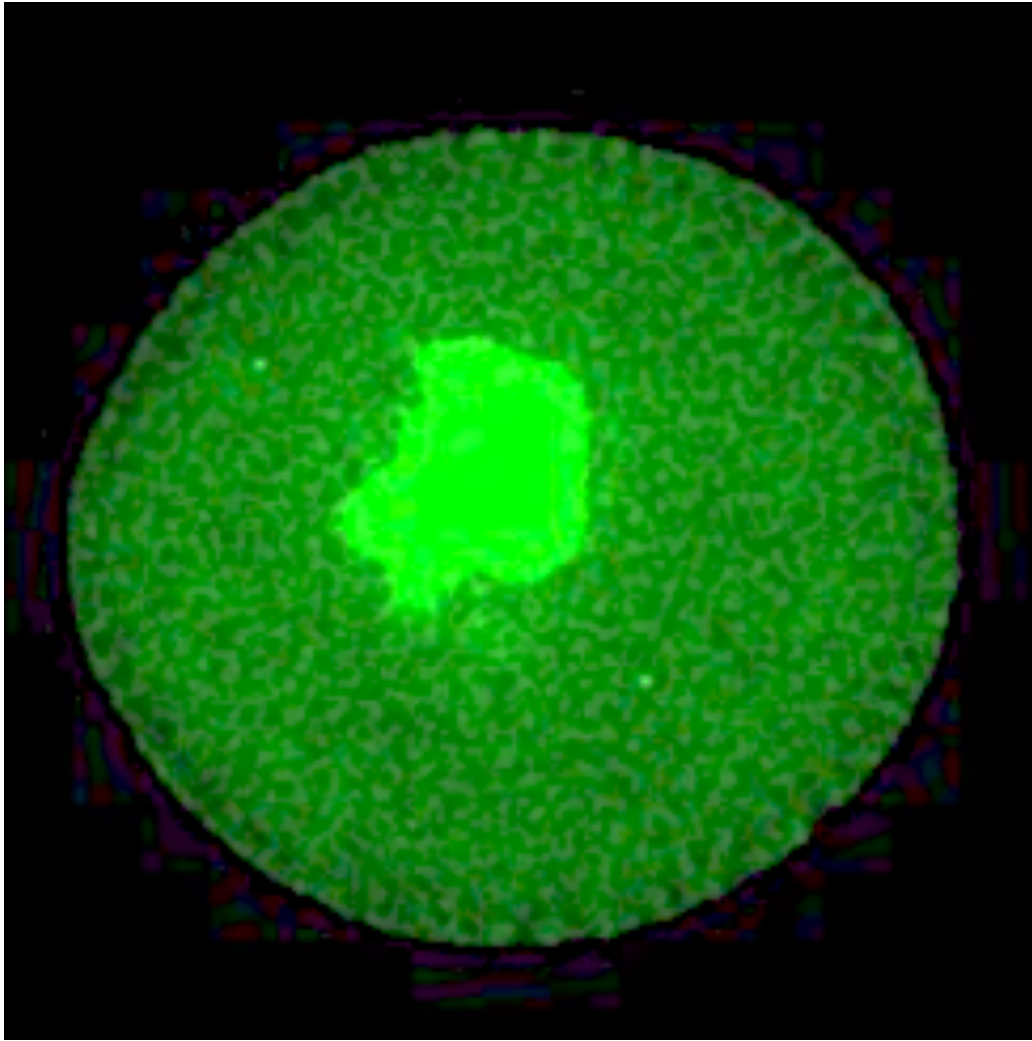

Supplement: PLD3-1-e00012-s002.pdf [file PLD3-1-e00012-s002.pdf]
